# Supplementary material
Source: PubMed Central journal article supplement (PMC3785148)
Supplement: NIHMS53628-supplement-Supplemental_Digital_Content_1.pdf [file NIHMS53628-supplement-Supplemental_Digital_Content_1.pdf]

**Supplemental Digital Content 1. Study selection criteria.**

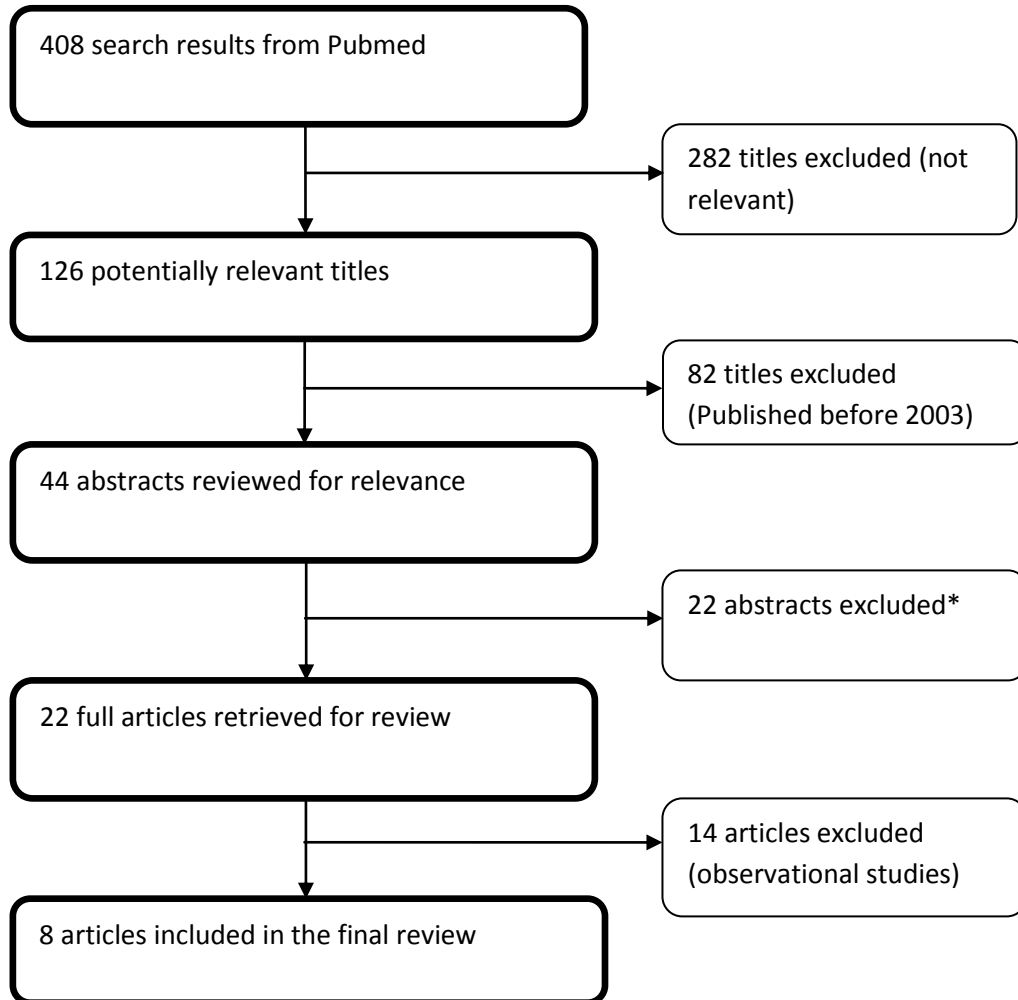

\* 22 abstracts excluded; 5 foreign languages, 6 case descriptions, 4 commentaries, 7 others
