# Supplementary material
Source: PubMed Central journal article supplement (PMC3785148)
Supplement: NIHMS53628-supplement-Supplemental_Digital_Content_2.pdf [file NIHMS53628-supplement-Supplemental_Digital_Content_2.pdf]

**Supplemental Digital Content 2.** Characteristics of included studies

| Author<br>Year     | Study design<br>Setting                                                   | Population                     | Intervention             | Control       | Results                                                                                                                                                                                                                                                                                                                                                                                                                                                                                                                                                                                                                                                                                                                                                                                                                                                                                                                                                                                                                                                                                                                                                                                                          |
|--------------------|---------------------------------------------------------------------------|--------------------------------|--------------------------|---------------|------------------------------------------------------------------------------------------------------------------------------------------------------------------------------------------------------------------------------------------------------------------------------------------------------------------------------------------------------------------------------------------------------------------------------------------------------------------------------------------------------------------------------------------------------------------------------------------------------------------------------------------------------------------------------------------------------------------------------------------------------------------------------------------------------------------------------------------------------------------------------------------------------------------------------------------------------------------------------------------------------------------------------------------------------------------------------------------------------------------------------------------------------------------------------------------------------------------|
| Mullany et al 2006 | Community cluster<br>RCT in southern Nepal<br><br>2 by 3 factorial design | 413 clusters<br>14887 newborns | 4% CHX<br>Soap and water | Dry cord care | <p><b>Mortality</b></p> <ul style="list-style-type: none"> <li>• 24% lower in the CHX group compared to dry care: RR 0.76, 95% CI 0.55 -1.04</li> <li>• If within 24 hrs reduction was 34%: RR 0.66, 95% CI 0.46-0.95</li> <li>• Soap and water did not reduce mortality</li> </ul> <p><b>Neonatal sepsis and omphalitis</b><br/>CHX associated with reductions in:</p> <ul style="list-style-type: none"> <li>• Redness extending to base of umbilicus: RR 0.68, 95%CI 0.58-0.80</li> <li>• Pus and moderate or severe redness or severe redness alone: RR 0.46, 95% CI 0.36-0.59</li> <li>• Severe redness and pus: RR 0.25, 95%CI 0.12-0.53</li> <li>• Initiation within 24hrs: RR 0.13, 95%CI 0.07-0.31</li> </ul> <p><b>Umbilical cord separation times UCST (days)</b></p> <ul style="list-style-type: none"> <li>• Overall mean (sd) =4.6 ± 2, median 4.33 (interquartile range 3.29-5.13)</li> <li>• 4% CHX, mean (sd): 5.32 ± 2.4</li> <li>• Soap mean (sd): 4.25 ± 1.6</li> <li>• Dry mean (sd): 4.24 ± 1.6</li> <li>• 65%of the 1229 infants whose separation time &gt;7days were in CHX group: RR 3.64, 95%CI 3.09-4.28</li> <li>• In the non CHX group 3% decrease in infection for each</li> </ul> |

additional day of cord separation: RR 0.97, 95%CI 0.92-1.03

|                    |                                        |                                |                                                  |               |                                                                                                                                                                                                                                                                                                                                                                                                                                                                                                                                                                                                                                                                                                                                                                                                                                                                                                          |
|--------------------|----------------------------------------|--------------------------------|--------------------------------------------------|---------------|----------------------------------------------------------------------------------------------------------------------------------------------------------------------------------------------------------------------------------------------------------------------------------------------------------------------------------------------------------------------------------------------------------------------------------------------------------------------------------------------------------------------------------------------------------------------------------------------------------------------------------------------------------------------------------------------------------------------------------------------------------------------------------------------------------------------------------------------------------------------------------------------------------|
| Arifeen et al 2012 | Community cluster RCT rural Bangladesh | 133 clusters<br>29760 newborns | 4% CHX<br>Single cleansing<br>Multiple cleansing | Dry cord care | <b>Mortality</b><br>Single cleansing with 4% CHX <ul style="list-style-type: none"><li>• 20% lower risk compared to dry care: RR 0.80, 95%CI 0.65 – 0.98</li></ul> Multiple cleansing (no significant reduction) <ul style="list-style-type: none"><li>• 6% lower risk compared to dry care: RR 0.94, 95%CI 0.78 – 1.14</li></ul><br><b>Neonatal sepsis and omphalitis</b><br>Redness extending to skin <ul style="list-style-type: none"><li>• Single 4% CHX: RR 0.93, 95%CI 0.61 – 1.43</li><li>• multiple 4% CHX: RR 0.78, 95%CI 0.50 – 1.22</li></ul> Pus and moderate redness or severe redness alone <ul style="list-style-type: none"><li>• single: RR 0.90, 95%CI 0.55– 1.46</li><li>• multiple: RR 0.55, 95%CI 0.31 – 0.95</li></ul> severe redness and pus <ul style="list-style-type: none"><li>• single: RR 0.77, 95%CI 0.40 – 1.48</li><li>• multiple: RR 0.35, 95%CI 0.15 – 0.81</li></ul> |
|--------------------|----------------------------------------|--------------------------------|--------------------------------------------------|---------------|----------------------------------------------------------------------------------------------------------------------------------------------------------------------------------------------------------------------------------------------------------------------------------------------------------------------------------------------------------------------------------------------------------------------------------------------------------------------------------------------------------------------------------------------------------------------------------------------------------------------------------------------------------------------------------------------------------------------------------------------------------------------------------------------------------------------------------------------------------------------------------------------------------|

---

|                          |                                                                                 |                                    |                                  |                              | <b>Umbilical cord separation times UCST (days)</b>                                                                                                                                                                                                                                                                                                                                                                                                                                                                                                                                                                                                                                                                                                                    |
|--------------------------|---------------------------------------------------------------------------------|------------------------------------|----------------------------------|------------------------------|-----------------------------------------------------------------------------------------------------------------------------------------------------------------------------------------------------------------------------------------------------------------------------------------------------------------------------------------------------------------------------------------------------------------------------------------------------------------------------------------------------------------------------------------------------------------------------------------------------------------------------------------------------------------------------------------------------------------------------------------------------------------------|
|                          |                                                                                 |                                    |                                  |                              | <ul style="list-style-type: none"> <li>• Not reported</li> </ul>                                                                                                                                                                                                                                                                                                                                                                                                                                                                                                                                                                                                                                                                                                      |
| Soofi et al<br>2012      | Community<br>cluster RCT<br><br>2 by 2 factorial<br>design in rural<br>Pakistan | 187 clusters<br>9741 newborns      | 4% CHX+HW<br>CHX only<br>HW only | Dry cord<br>care             | <p><b>Mortality</b></p> <ul style="list-style-type: none"> <li>• CHX + HW: RR 0.64, 95%CI 0.39 – 1.06</li> <li>• HW only: RR 1.23, 95%CI 0.82 – 1.83</li> <li>• CHX only: RR 0.74, 95%CI 0.50 – 1.08</li> </ul> <p><b>Neonatal sepsis and omphalitis<br/>(any of the indicators of omphalitis)</b></p> <ul style="list-style-type: none"> <li>• CHX + HW: RR 0.53, 95% CI 0.32 – 0.88</li> <li>• HW only: RR 0.67, 95% CI 0.48 – 0.93</li> <li>• CHX only: RR 0.44, 95%CI 0.29 – 0.67</li> </ul> <p><b>Umbilical cord separation times UCST (days)</b></p> <ul style="list-style-type: none"> <li>• CHX + HW mean (sd): 6.2 ± 1.3</li> <li>• HW only mean (sd): 5.9 ± 1.5</li> <li>• CHX only mean (sd): 6.0 ± 1.6</li> <li>• Control mean (sd): 6.0 ± 1.6</li> </ul> |
| Pezzati et<br>al<br>2003 | Prospective RCT<br>Hospital in Italy                                            | 244 preterm<br>newborn babies      | 4% CHX<br>solution               | Salicylic<br>sugar<br>powder | <p><b>Mortality</b></p> <ul style="list-style-type: none"> <li>• No cases mortality was reported</li> </ul> <p><b>Neonatal sepsis and omphalitis</b></p> <ul style="list-style-type: none"> <li>• 1 sepsis case in each arm</li> </ul> <p><b>Umbilical cord separation times UCST (days)</b></p> <ul style="list-style-type: none"> <li>• Not reported</li> </ul>                                                                                                                                                                                                                                                                                                                                                                                                     |
| Ahmadpo<br>ur-Kacho      | RCT<br>Teaching hospital                                                        | 373 enrolled, 312<br>completed the | Breast milk<br>96% ethyl         | Dry cord<br>care             | <ul style="list-style-type: none"> <li>• No cases mortality was reported</li> <li>• No cases of sepsis or Omphalitis</li> </ul>                                                                                                                                                                                                                                                                                                                                                                                                                                                                                                                                                                                                                                       |

|                         |                                                                  |                                                                        |                                                                                                             |                                        |                                                                                                                                                                                                                                                                                                                                                                   |
|-------------------------|------------------------------------------------------------------|------------------------------------------------------------------------|-------------------------------------------------------------------------------------------------------------|----------------------------------------|-------------------------------------------------------------------------------------------------------------------------------------------------------------------------------------------------------------------------------------------------------------------------------------------------------------------------------------------------------------------|
| et al<br>2006           | in Iran                                                          | study                                                                  | alcohol<br>Silver<br>sulfadiazine                                                                           |                                        | <p><b>Umbilical cord separation times UCST (days)</b></p> <ul style="list-style-type: none"> <li>Breast milk mean (sd): 5.16 ± 1.79</li> <li>96% Alcohol mean (sd): 6.41 ± 1.95</li> <li>Silver sulphadiazene mean (sd): 10.45 ± 3.62</li> <li>Control (sd): 6.58 ± 2.16</li> </ul>                                                                               |
| Hsu et al<br>2010       | RCT<br>In Taiwan                                                 | 150 neonates<br>consecutive births<br>in a hospital                    | 95% alcohol<br>(n=75)<br><br>Triple dye<br>applied<br>immediately<br>after birth<br>before<br>randomization | Natural<br>air drying<br>(n=75)        | <ul style="list-style-type: none"> <li>No omphalitis or infection reported<br/>(definition used for omphalitis not provided)</li> </ul> <p><b>Umbilical cord separation times UCST (days)</b></p> <ul style="list-style-type: none"> <li>Alcohol mean (sd): 10.6 ± 2.5</li> <li>Control mean (sd): 11.7 ± 3.4</li> </ul>                                          |
| Sulimanet<br>al<br>2010 | Prospective RCT<br>USA                                           | 90 Healthy full-<br>term newborns<br>Follow up till cord<br>separation | Triple dye plus<br>alcohol (51.1%)<br>(TD + A)                                                              | Triple dye<br>alone<br>(48.9%)<br>(TD) | <ul style="list-style-type: none"> <li>No significant signs of infection were reported</li> </ul> <p><b>Umbilical cord separation times UCST (days)</b></p> <ul style="list-style-type: none"> <li>Triple dye + Alcohol mean = 16.6 (range 9-43)</li> <li>Triple dye mean = 15.6 (range 8-28)</li> </ul>                                                          |
| Erenel et<br>al<br>2009 | RCT<br>Post partum clinic<br>of a university<br>clinic in Turkey | 150 newborns                                                           | Olive oil (n=75)                                                                                            | Air drying<br>(n=75)                   | <ul style="list-style-type: none"> <li>No omphalitis was reported</li> </ul> <p><b>Umbilical cord separation times UCST (days)</b></p> <ul style="list-style-type: none"> <li>Olive oil mean (sd)= 9.1±3.1(range 3-18)</li> <li>Control mean (sd) = 9.8±2.5 (range 3-18)</li> <li>At 10 days 71.6% in olive group and 56% in the control had separated</li> </ul> |

\*The Cochrane review of 2004 Zupan et al also did not report any mortality in any of the reviewed 21 studies; \*RR= risk ratio; CHX = Chlorhexidine solution; HW = hand washing; sd = standard deviation; TD = Triple dye; A = Alcohol
