# Supplementary material
Source: PubMed Central journal article supplement (PMC3785148)
Supplement: NIHMS53628-supplement-Supplemental_Digital_Content_3.pdf [file NIHMS53628-supplement-Supplemental_Digital_Content_3.pdf]

**Supplemental Digital Content 3. Cord separation times**

| <b>Study</b>                          | <b>Intervention</b>     | <b>Mean cord separation time (days)<br/>±standard deviation</b> |
|---------------------------------------|-------------------------|-----------------------------------------------------------------|
| Mullany et al 2006 (15)<br>(n=14,887) | 4% CHX                  | 5.32 ± 2.4                                                      |
| Nepal                                 | Soap and water          | 4.25 ± 1.6                                                      |
|                                       | Dry cord care           | 4.24 ± 1.6                                                      |
| Ahmadpour et al (16)<br>(n=312)       | Breast milk             | 5.16 ± 1.79                                                     |
| Iran                                  | 96% Alcohol             | 6.41 ± 1.95                                                     |
|                                       | Silver sulphadiazene    | 10.45 ± 3.62                                                    |
|                                       | Dry cord care           | 6.58 ± 2.16                                                     |
| Erenel et al (18) (n=150)             | Olive oil               | 9.1 ± 3.1                                                       |
| Turkey                                | Dry cord care           | 9.8 ± 2.5                                                       |
| Hsu et al (19) (n=150)                | Alcohol                 | 10.6 ± 2.5                                                      |
| Taiwan                                | Dry cord care           | 11.7 ± 3.4                                                      |
| Soofi et al (21) (n=9,741)            | HW + 4% CHX             | 6.2 ± 1.3                                                       |
| Pakistan                              | HW                      | 5.9 ± 1.5                                                       |
|                                       | 4% CHX                  | 6.0 ± 1.6                                                       |
|                                       | Dry cord care           | 6.0 ± 1.6                                                       |
| Suliman et al (22) (n=90)             | Triple Dye Plus Alcohol | 16.6                                                            |
| USA                                   | Triple Dye              | 15.6                                                            |
